# Supplementary material for: Analysis of Mechanical Response for a Reinforced Bedded Rock Slope under Rainfall
Source: Hindawi journal article supplement (doi:10.1155/2019/9864230), 2019-01-01
Supplement: f1 [file 9864230.f1.zip]

Archive with 3 entries (3 files):
- 9864230.f1/1.displacement .xls
- 9864230.f1/2.pore pressure.xls
- 9864230.f1/3.thrust press.xls
