# Supplementary material for: Analysis of Mechanical Response for a Reinforced Bedded Rock Slope under Rainfall
Source: Hindawi journal article supplement (doi:10.1155/2019/9864230), 2019-01-01
Supplement: f1 [file 9864230.f1.zip › 9864230.f1/1.displacement .xls]

## Sheet: Sheet1
																	LW
		时间	M1	M2	M3	M4											时间	D1	D2	D3	D5		D8	D7	D9
		0	0	0	0	0											0	0	0	0	0	0	0	0	0
		1	0.05	0.12	0.11	0.67											1	0.12	0.15	0.3	0.24	0.065	0.0216667	0.0195	0.0242667
		2	0.1	0.16	0.35	0.94											2	0.16	0.65	0.24	0.25	0.13	0.0433333	0.039	0.0485333
		3	0.23	0.47	0.69	1.2											3	0.47	1.1	1.34	0.29	0.159	0.053	0.0477	0.05936
		4	0.47	1.03	0.77	1.2											4	1.03	1.4	1.86	0.4	0.272	0.0906667	0.0816	0.101547
		5	1.23	2.09	0.83	1.49											5	1.8	2.09	2.51	0.76	0.353	0.117667	0.1059	0.131787
		6	2.17	2.7	1.04	1.97											6	2.25	2.7	2.88	1	0.467	0.155667	0.1401	0.174347
		7	2.62	3.23	1.02	1.94											7	2.49	3.23	3.53	1.22	0.522	0.174	0.1566	0.19488
		8	2.64	3.45	1.09	1.93											8	3.4	3.54	3.85	1.31	0.723	0.241	0.204	0.26992
		9	3.29	3.71	1.09	1.91											9	3.63	3.85	4.26	2.26	0.766	0.255333	0.2298	0.285973
		10	3.29	3.71	1.09	1.95											10	3.71	4.3	4.86	2.78	0.891	0.297	0.2673	0.33264
		11	3.59	4.1	1.12	1.94											11	4.1	4.4	4.86	3.56	0.94	0.313333	0.282	0.350933
		12	3.6	4.34	1.11	2.02											12	4.34	4.66	5.2	4.01	1.027	0.342333	0.3081	0.383413
		13	3.77	4.57	1.16	2.05											13	4.57	4.8	6.17	4.19	1.12	0.373333	0.336	0.418133
		14	4.26	4.7	1.16	1.98											14	4.7	5.11	6.47	4.37	1.212	0.404	0.3636	0.45248
		15	4.45	4.88	1.11	2											15	4.88	5.64	7.52	5.11	1.315	0.438333	0.409	0.490933
		16	4.47	5.18	1.16	2											16	5.18	6.12	8.61	5.51	1.462	0.487333	0.427	0.545813
		17	4.44	5.66	1.11	2.1											17	5.66	6.45	8.64	5.47	1.467	0.489	0.448	0.54768
		18	4.47	5.7	1.06	2.1											18	5.7	6.53	8.76	6.15	1.505	0.501667	0.4515	0.561867
		19	4.53	5.76	1.14	2.07											19	5.76	6.61	8.8	6.17	1.58485	0.528283	0.475454	0.591676
		20	4.49	5.76	1.11	2.09											20	5.76	6.61	8.83	6.22	1.63	0.543333	0.508	0.608533
