# Supplementary material for: Analysis of Mechanical Response for a Reinforced Bedded Rock Slope under Rainfall
Source: Hindawi journal article supplement (doi:10.1155/2019/9864230), 2019-01-01
Supplement: f1 [file 9864230.f1.zip › 9864230.f1/2.pore pressure.xls]

## Sheet: Sheet1
时间	P1(M2)	P3(M2)	P5(M2)	P1(M4)	P3(M4)	P5(M4)			时间	P1(M1)	P3(M1)	P5(M1)	P1(M2)	P3(M2)	P5(M2)
0	-0.01435	-0.01665	-0.04	-0.01665	-0.01665	-0.04			0	-0.01435	-0.01665	-0.04265	-0.01435	-0.01665	-0.04
0.4	-0.0113	-0.01645	-0.0381939	-0.01645	-0.01645	-0.0382			0.4	-0.0144	-0.01645	-0.04245	-0.0113	-0.01645	-0.0381939
0.8	-0.00705	-0.0111	-0.0402	-0.0107	-0.016	-0.04			0.8	-0.0129	-0.0136	-0.0409	-0.00705	-0.0111	-0.0402
1.2	-0.0016	-0.0055	-0.039	-0.0084	-0.0152	-0.0382			1.2	-0.0133	-0.0126	-0.03765	-0.0016	-0.0055	-0.039
1.6	0.00365	-0.0028	-0.042194	-0.0042	-0.009	-0.04			1.6	-0.003	-0.0076	-0.0386	0.00365	-0.0028	-0.042194
2	0.01	0.0007	-0.042194	0.001	-0.0026	-0.0388			2	-0.0005	-0.0085	-0.0389	0.01	0.0007	-0.042194
2.4	0.01465	0.00485	-0.04	0.0078	0.0029	-0.04			2.4	0.0031	-0.0045	-0.0385	0.01465	0.00485	-0.04
2.8	0.02075	0.00715	-0.0381939	0.0137	0.008	-0.0415			2.8	0.0102	0	-0.0377	0.02075	0.00715	-0.0381939
3.2	0.02685	0.0121	-0.0402	0.0146	0.0164	-0.04			3.2	0.0182	0.0031	-0.038	0.02685	0.0121	-0.0402
3.6	0.03295	0.01855	-0.039	0.016	0.0215	-0.0382			3.6	0.0214	0.0082	-0.0357	0.03295	0.01855	-0.039
4	0.03835	0.0252	-0.042194	0.025	0.0274	-0.04			4	0.0246	0.0094	-0.0361	0.03835	0.0252	-0.042194
4.4	0.0448	0.0335	-0.042194	0.0267	0.036	-0.0412			4.4	0.0306	0.011	-0.0371	0.0448	0.0335	-0.042194
4.8	0.04955	0.0355	-0.04	0.0312	0.0447	-0.0415			4.8	0.0378	0.017	-0.0357	0.04955	0.0355	-0.04
5.2	0.05395	0.03815	-0.0381939	0.0331	0.0569	-0.0391			5.2	0.0426	0.0194	-0.035	0.05395	0.03815	-0.0381939
5.6	0.057	0.0426	-0.0369	0.0377	0.0696	-0.0379			5.6	0.0462	0.02	-0.0336	0.057	0.0426	-0.0369
6	0.0607	0.0445	-0.0362	0.0422	0.0797	-0.0379			6	0.0494	0.0234	-0.034	0.0607	0.0445	-0.0362
6.4	0.0621	0.048	-0.036	0.0403	0.0818	-0.0376			6.4	0.052	0.0274	-0.0347	0.0621	0.048	-0.036
6.8	0.0664	0.0463	-0.0337	0.037	0.08	-0.036			6.8	0.056	0.0286	-0.0357	0.0664	0.0463	-0.0337
7.2	0.0696	0.05115	-0.0292	0.0344	0.0764	-0.036			7.2	0.0589	0.0298	-0.035	0.0696	0.05115	-0.0292
7.6	0.07235	0.0544	-0.0234	0.0344	0.076	-0.037			7.6	0.06	0.0346	-0.0357	0.07235	0.0544	-0.0234
8	0.07325	0.057	-0.0207	0.0338	0.072	-0.0367			8	0.0613	0.0394	-0.0375	0.07325	0.057	-0.0207
8.4	0.0772	0.0585	-0.019	0.0341	0.0726	-0.036			8.4	0.0637	0.0434	-0.0357	0.0772	0.0585	-0.019
8.8	0.07955	0.0608	-0.0208	0.0312	0.0717	-0.037			8.8	0.0649	0.045	-0.0361	0.07955	0.0608	-0.0208
9.2	0.08235	0.0608	-0.0197	0.0315	0.0692	-0.0358			9.2	0.0661	0.048	-0.0368	0.08235	0.0608	-0.0197
9.6	0.0843	0.0617	-0.0183	0.0315	0.0658	-0.037			9.6	0.0693	0.0502	-0.0368	0.0843	0.0617	-0.0183
10	0.0843	0.0676	-0.0153	0.032	0.0671	-0.0349			10	0.0709	0.0529	-0.0372	0.0843	0.0676	-0.0153
10.4	0.0847	0.077	-0.0184	0.0305	0.0683	-0.0364			10.4	0.0717	0.0569	-0.0348	0.0847	0.077	-0.0184
10.8	0.096	0.091	-0.0168	0.0315	0.0645	-0.036			10.8	0.0773	0.056	-0.0356	0.096	0.091	-0.0168
11.2	0.0849	0.1036	-0.016	0.0315	0.0645	-0.0355			11.2	0.0813	0.0577	-0.0347	0.0849	0.1036	-0.016
11.6	0.0784	0.108	-0.0129	0.0328	0.0645	-0.0352			11.6	0.0784	0.0589	-0.0348	0.0784	0.108	-0.0129
12	0.0833	0.1097	-0.008	0.0328	0.0662	-0.0355			12	0.0833	0.06	-0.0344	0.0833	0.1097	-0.008
12.4	0.0964	0.1055	-0.0051	0.032	0.0645	-0.0352			12.4	0.0741	0.0605	-0.0343	0.0964	0.1055	-0.0051
12.8	0.0821	0.1069	-0.0003	0.0322	0.064	-0.0355			12.8	0.0821	0.0595	-0.0347	0.0821	0.1069	-0.0003
13.2	0.0938	0.1069	0.0046	0.0302	0.0658	-0.0355			13.2	0.0873	0.0585	-0.0336	0.0938	0.1069	0.0046
13.6	0.0861	0.1055	0.0036	0.0289	0.0662	-0.0352			13.6	0.0861	0.0602	-0.0343	0.0861	0.1055	0.0036
14	0.0957	0.1074	0.0055	0.0273	0.064	-0.0352			14	0.0857	0.06	-0.0354	0.0957	0.1074	0.0055
14.4	0.0831	0.1069	0.006	0.0273	0.0645	-0.0352			14.4	0.0823	0.0593	-0.0344	0.0831	0.1069	0.006
14.7	0.0817	0.1106	0.0075	0.0276	0.0645	-0.036			14.7	0.0817	0.0565	-0.0323	0.0817	0.1106	0.0075
15.2	0.0804	0.091	0.0104	0.028	0.0654	-0.0379			15.2	0.0804	0.0541	-0.0303	0.0804	0.091	0.0104
15.6	0.076	0.088	0.0099	0.0289	0.065	-0.0364			15.6	0.0833	0.0518	-0.0282	0.076	0.088	0.0099
16	0.0723	0.0831	0.0089	0.0263	0.0649	-0.0343			16	0.079	0.0478	-0.0246	0.0723	0.0831	0.0089
16.4	0.0704	0.0807	0.0109	0.026	0.0633	-0.0367			16.4	0.0698	0.045	-0.0217	0.0704	0.0807	0.0109
16.8	0.0672	0.0789	0.012	0.025	0.0628	-0.0346			16.8	0.061	0.0422	-0.0205	0.0672	0.0789	0.012
17.2	0.0632	0.077	0.0099	0.0231	0.0637	-0.036			17.2	0.0532	0.0434	-0.0132	0.0632	0.077	0.0099
17.6	0.0609	0.0737	0.0128	0.0195	0.0624	-0.036			17.6	0.0486	0.0418	-0.0095	0.0609	0.0737	0.0128
18	0.0622	0.0737	0.0123	0.02	0.0633	-0.0352			18	0.0454	0.0414	-0.0046	0.0622	0.0737	0.0123
18.4	0.0619	0.0714	0.0129	0.0189	0.0624	-0.0364			18.4	0.0464	0.0406	-0.001	0.0619	0.0714	0.0129
18.8	0.0616	0.072	0.0139	0.0195	0.0633	-0.0352			18.8	0.0464	0.0398	0.0019	0.0616	0.072	0.0139
19.2	0.0609	0.0704	0.0139	0.0172	0.0628	-0.0358			19.2	0.0461	0.04	0.0035	0.0609	0.0704	0.0139
19.6	0.0619	0.0709	0.0139	0.0169	0.0628	-0.0348			19.6	0.044	0.0394	0.0027	0.0619	0.0709	0.0139
20	0.0606	0.0686	0.0143	0.015	0.0628	-0.0338			20	0.0447	0.0382	0.0055	0.0606	0.0686	0.0143
