# Supplementary material for: Analysis of Mechanical Response for a Reinforced Bedded Rock Slope under Rainfall
Source: Hindawi journal article supplement (doi:10.1155/2019/9864230), 2019-01-01
Supplement: f1 [file 9864230.f1.zip › 9864230.f1/3.thrust press.xls]

## Sheet: Sheet1
							M2
		M2	M1	M4	M3			C1	C2	C3
	0	2.49	1.99	1.69	1.81		0	0.68	1.56	2.49
	0.5	2.64	2.1	1.69	1.81		0.5	1.18	1.62	2.64
	1	2.76	2.3828	1.83	2.02		1	1.42	1.89	2.76
	1.5	2.87	2.3828	1.83	2.02		1.5	2.06	2.98	2.87
	2	3.06	2.45	1.88	2.12		2	2.18	3.36	3.06
	2.5	3.39	2.45	1.88	2.12		2.5	2.48	3.45	3.39
	3	2.85	2.45	1.9	2.21		3	2.63	3.33	2.85
	3.5	2.8	2.7	1.9	2.4		3.5	2.71	3.4	2.8
	4	2.88	2.67	1.93	2.2		4	2.74	3.6	2.88
	4.5	2.98	2.67	1.93	2.2		4.5	2.8	3.75	2.98
	5	3.06	2.79	2.07	2.32		5	2.86	3.89	3.06
	5.5	3.46	3.17	2.19	2.32		5.5	2.89	3.95	3.46
	6	3.24	2.62	2.25	2.96		6	2.8	4.1	3.24
	6.5	3.05	2.62	2.43	2.9		6.5	2.77	4.25	3.05
	7	3.42	3.2	2.34	2.96		7	2.95	4.28	3.42
	7.5	3.3	2.84	2.28	2.8		7.5	2.86	4.16	3.3
	8	3.34	2.93	2.29	2.8		8	2.95	4.37	3.34
	8.5	3.87	3.01	2.29	2.8		8.5	2.8	4.22	3.87
	9	3.95	2.99	2.36	2.87		9	2.71	4.34	3.95
	9.5	3.99	3.57	2.36	2.87		9.5	2.68	4.13	3.99
	10	3.66	3.37	2.36	2.89		10	2.8	4.2	3.66
	10.5	3.75	3.43	2.36	2.89		10.5	2.86	4.13	3.75
	11	4.3	3.8	2.36	2.98		11	2.83	3.98	4.3
	11.5	4.54	3.65	2.36	2.98		11.5	2.77	4	4.54
	12	4.81	4.28	2.46	3.09		12	2.89	4.04	4.81
	12.5	5.66	4.36	2.46	3.09		12.5	2.92	4	5.66
	13	6.22	5.06	2.55	3.17		13	2.92	4.25	6.22
	13.5	7.53	4.89	2.55	3.17		13.5	3.07	4.22	7.53
	14	9.19	4.93	2.58	3.28		14	3.24	4.4	9.19
	14.5	8.47	5.28	2.58	3.28		14.5	3	3.95	8.47
	15	8.15	4.89	2.65	3.33		15	2.92	3.78	8.15
	15.5	7.97	4.9	2.65	3.33		15.5	2.54	3.66	7.97
	16	8.21	5.09	2.65	3.42		16	2.45	3.54	8.21
	16.5	7.82	4.99	2.65	3.42		16.5	2.31	3.54	7.82
	17	7.64	5.06	2.61	3.44		17	2.24	3.54	7.64
	17.5	7.41	4.99	2.58	3.29		17.5	2.2	3.63	7.41
	18	7.6	5.09	2.52	3.26		18	2.2	3.48	7.6
	18.5	7.56	4.99	2.61	3.38		18.5	2.06	3.36	7.56
	19	7.53	5.09	2.55	3.38		19	2.04	3.4	7.53
	19.5	7.6	5.11	2.55	3.35		19.5	2.09	3.54	7.6
	20	7.7	5.04	2.52	3.17		20	2.38	2.71	7.7
